# Supplementary material
Source: MDPI journal article supplement (https://www.mdpi.com/2311-7524/7/12/568)
Supplement: s1 [file s1]

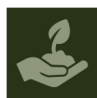

## Supplementary

**Table S1.** Effect of foliar application of salicylic acid (SA) (2 and 4 mM), abscisic acid (ABA) (0.25 and 0.50 mM), and methyl jasmonate (MeJA) (0.25 and 0.50 mM) on weight loss and firmness (N) of strawberry fruits stored at 4° C for 12 days.

| Treatment | Weight loss (%) |           |           |             | Firmness (N) |              |             |
|-----------|-----------------|-----------|-----------|-------------|--------------|--------------|-------------|
|           | 4 days          | 8 days    | 12 days   | 0 days      | 4 days       | 8 days       | 12 days     |
| 2 SA      | 2.4±0.1 c       | 4.5±0.1 b | 6.4±0.2 a | 2.93±0.17 a | 2.73±0.03 a  | 1.50±0.00 b  | 1.43±0.09 b |
| 4 SA      | 3.7±0.0 c       | 5.3±0.3 b | 7.3±0.4 a | 3.03±0.03 a | 2.47±0.03 b  | 1.60±0.00 c  | 1.43±0.03 d |
| 0.25 ABA  | 2.2±0.1 c       | 4.3±0.2 b | 6.3±0.3 a | 2.83±0.12 a | 2.07±0.09 b  | 1.70±0.06 bc | 1.57±0.03 c |
| 0.50 ABA  | 2.8±0.3 b       | 4.9±0.5 b | 7.4±0.8 a | 2.63±0.09 a | 1.83±0.03 b  | 1.67±0.03 bc | 1.53±0.03 c |
| 0.25 MeJA | 3.7±0.1 c       | 5.6±0.3 b | 8.1±0.7 a | 3.03±0.03 a | 2.53±0.03 b  | 1.83±0.03 c  | 1.53±0.03 d |
| 0.50 MeJA | 3.0±0.2 c       | 4.9±0.5 b | 7.1±0.2 a | 3.27±0.12 a | 2.50±0.06 b  | 1.53±0.03 c  | 1.33±0.09 c |
| Control   | 2.6±0.1 c       | 4.0±0.4 b | 7.2±0.2 a | 2.93±0.09 a | 2.57±0.03 b  | 1.53±0.03 c  | 1.27±0.03 d |

The results are expressed as mean ±SE of three replicates followed by a letter. Different letters indicate significant statistical differences among days of storage in the same row ( $p < 0.05$ ).

**Table S2.** Effect of foliar application of salicylic acid (SA) (2 and 4 mM), abscisic acid (ABA) (0.25 and 0.50 mM), and methyl jasmonate (MeJA) (0.25 and 0.50 mM) on surface colour of strawberry fruits stored at 4 °C for 12 days.

| Treatments | Days | L*            | a*            | b*            | C*            | h°            |
|------------|------|---------------|---------------|---------------|---------------|---------------|
| 2 SA       | 0    | 37.65±1.90 a  | 34.06±1.04 a  | 24.09±3.36 a  | 41.88±2.41 a  | 34.95±3.43 a  |
|            | 4    | 30.03±0.32 b  | 27.13±0.72 b  | 15.51±0.70 a  | 31.07±0.40 a  | 29.80±1.77 a  |
|            | 8    | 32.79±2.37 ab | 28.81±2.37 ab | 18.20±3.58 a  | 34.18±3.89 a  | 31.6±3.05 a   |
|            | 12   | 30.75±0.02 ab | 30.45±1.40 ab | 17.96±1.40 a  | 35.42±1.96 a  | 30.71±0.99a   |
| 4 SA       | 0    | 35.52±1.14 a  | 32.21±1.64 a  | 22.98±2.43 a  | 39.58±2.72 a  | 35.26±1.58 a  |
|            | 4    | 31.14±0.19 b  | 27.54±1.98 a  | 18.29±0.79 ab | 33.07±2.08 a  | 33.74±0.78 a  |
|            | 8    | 34.80±0.47 a  | 31.38±0.41 a  | 24.00±0.51 a  | 39.52±0.52 a  | 37.44±0.53 a  |
|            | 12   | 27.39±0.79 c  | 28.24±0.94 a  | 13.61±1.43 b  | 31.38±1.46 a  | 25.50±1.62 b  |
| 0.25 ABA   | 0    | 32.59±1.85 a  | 28.98±2.69 a  | 16.36±3.16 a  | 33.57±3.75 a  | 28.68±2.45 a  |
|            | 4    | 29.84±0.65 a  | 26.00±0.05 a  | 13.43±0.16 a  | 30.15±0.12 a  | 26.44±0.23 a  |
|            | 8    | 31.42±1.44 a  | 28.51±1.10 a  | 18.71±2.12 a  | 34.28±1.26 a  | 32.99±2.83 a  |
|            | 12   | 29.37±0.24 a  | 27.50±0.76 a  | 17.15±0.22 a  | 32.43±0.53 a  | 32.0±1.04 a   |
| 0.50 ABA   | 0    | 30.38±1.94 b  | 23.72±4.11 b  | 13.13±3.40 b  | 27.16±5.20 b  | 27.89±2.86 b  |
|            | 4    | 30.44±1.33 b  | 26.11±1.86 ab | 18.65±2.32 ab | 32.12±2.86 ab | 35.15±1.47 ab |
|            | 8    | 39.27±0.47 a  | 34.62±0.51 a  | 29.74±2.12 a  | 45.68±1.70 a  | 40.61±1.58 a  |
|            | 12   | 34.54±2.07 ab | 31.85±1.32 ab | 24.38±4.57 ab | 40.41±3.80 ab | 36.26±4.13 ab |
| 0.25 MeJA  | 0    | 36.89±2.42 a  | 30.34±1.49 a  | 22.4±4.67 a   | 37.94±3.52 a  | 35.77±4.81 a  |
|            | 4    | 31.19±0.04 a  | 27.92±0.54 a  | 16.98±0.80 a  | 32.68±0.88 a  | 31.24±0.71 a  |
|            | 8    | 36.33±3.64 a  | 31.22±2.41 a  | 27.07±5.50 a  | 41.59±5.02 a  | 39.88±4.92 a  |
|            | 12   | 30.14±1.06 a  | 29.81±0.46 a  | 19.13±2.62 a  | 35.67±1.84 a  | 32.11±3.13 a  |
| 0.50 MeJA  | 0    | 30.79±1.12 a  | 24.49±0.92 b  | 13.44±1.55 b  | 27.98±1.39 b  | 28.47±2.18 a  |
|            | 4    | 30.23±0.53 a  | 26.77±0.93 b  | 15.75±0.21 ab | 31.08±0.70 b  | 30.56±1.20 a  |
|            | 8    | 33.30±0.77 a  | 32.64±0.97 a  | 21.05±3.32 ab | 39.30±2.28 a  | 33.34±2.87 a  |
|            | 12   | 33.34±0.32 a  | 32.57±0.76 a  | 23.51±0.42 a  | 40.17±0.86 a  | 35.83±0.15 a  |
| Control    | 0    | 31.94±0.24 b  | 31.57±1.15 ab | 19.39±1.67 bc | 37.15±1.89 ab | 31.62±1.43 a  |
|            | 4    | 29.16±0.31 b  | 26.97±0.27 b  | 15.78±0.57 c  | 31.27±0.05 b  | 30.33±1.16 b  |
|            | 8    | 37.87±2.06 a  | 32.59±1.72 a  | 27.73±2.64 a  | 42.90±2.23 a  | 40.28±3.02 a  |
|            | 12   | 33.29±1.05 ab | 31.35±0.67 ab | 24.21±1.52 ab | 39.38±1.31 a  | 37.13±0.91 ab |

The results are expressed as mean ±SE of three replicates followed by a letter. Different letters indicate significant statistical differences among days of storage in the same column ( $p < 0.05$ ). L\*, a\*, b\* (L\*: lightness, a\*: positive values means redness but negative values means greenness, b\*: positive values means yellowness but negative values means blueness) chroma (C\*), and hue angle (h°) were used to establish colour characteristics for fruits.

**Table S3.** Effect of foliar application of salicylic acid (SA) (2 and 4 mM), abscisic acid (ABA) (0.25 and 0.50 mM), and methyl jasmonate (MeJA) (0.25 and 0.50 mM) on TSS, pH, and TA of strawberry fruits stored at 4 °C for 12 days.

| Treatments | Days | TSS (%)      | pH           | TA           |
|------------|------|--------------|--------------|--------------|
| 2 SA       | 0    | 5.66±0.09 a  | 3.58±0.08 a  | 0.56±0.01 a  |
|            | 4    | 6.03±0.09 a  | 3.23±0.03 b  | 0.55±0.01 a  |
|            | 8    | 5.87±0.15 a  | 3.84±0.05 a  | 0.33±0.01 b  |
|            | 12   | 5.47±0.18 a  | 3.67±0.09 a  | 0.34±0.01 b  |
| 4 SA       | 0    | 5.27±0.09 b  | 3.72±0.06 a  | 0.46±0.01 a  |
|            | 4    | 6.37±0.09 a  | 3.07±0.03 b  | 0.51±0.02 a  |
|            | 8    | 6.03±0.28 a  | 3.85±0.03 a  | 0.27±0.01 b  |
|            | 12   | 5.30±0.06 b  | 3.87±0.03 a  | 0.27±0.01 b  |
| 0.25 ABA   | 0    | 6.20±0.17 b  | 3.51±0.01 b  | 0.46±0.01 b  |
|            | 4    | 6.37±0.18 ab | 3.10±0.06 c  | 0.53±0.01 a  |
|            | 8    | 7.00±0.00 a  | 3.89±0.03 a  | 0.27±0.01 d  |
|            | 12   | 6.27±0.15 b  | 3.73±0.03 a  | 0.31±0.00 c  |
| 0.50 ABA   | 0    | 5.43±0.03 bc | 3.65±0.06 a  | 0.49±0.03 a  |
|            | 4    | 5.33±0.09 c  | 3.27±0.12 b  | 0.51±0.00 a  |
|            | 8    | 6.03±0.20 a  | 3.63±0.04 a  | 0.40±0.00 b  |
|            | 12   | 5.93±0.09 ab | 3.80±0.06 a  | 0.29±0.00 c  |
| 0.25 MeJA  | 0    | 5.83±0.07 ab | 3.50±0.03 a  | 0.58±0.01 a  |
|            | 4    | 6.17±0.09 a  | 3.17±0.03 b  | 0.52±0.02 b  |
|            | 8    | 5.60±0.12 b  | 3.48±0.03 a  | 0.51±0.00 b  |
|            | 12   | 5.73±0.12 ab | 3.73±0.12 a  | 0.32±0.01 c  |
| 0.50 MeJA  | 0    | 5.50±0.06 b  | 3.50±0.03 b  | 0.53±0.01 a  |
|            | 4    | 5.93±0.09 b  | 3.10±0.06 c  | 0.56±0.01 a  |
|            | 8    | 6.80±0.30 a  | 3.92±0.01 a  | 0.30±0.01 c  |
|            | 12   | 5.90±0.06 b  | 3.60±0.06 b  | 0.37±0.01 b  |
| Control    | 0    | 5.23±0.15 b  | 3.52±0.01 ab | 0.46±0.01 ab |
|            | 4    | 5.90±0.06 a  | 3.17±0.07 c  | 0.54±0.01 a  |
|            | 8    | 5.70±0.15 ab | 3.23±0.12 bc | 0.38±0.04 bc |
|            | 12   | 5.27±0.19 ab | 3.57±0.03 a  | 0.36±0.01 c  |

The results are expressed as mean ±SE of three replicates followed by a letter. Different letters indicate significant statistical differences among days of storage in the same column ( $p < 0.05$ ).

**Table S4.** Effect of foliar application of salicylic acid (SA) (2 and 4 mM), abscisic acid (ABA) (0.25 and 0.50 mM), and methyl jasmonate (MeJA) (0.25 and 0.50 mM) on ascorbic acid (AsA), total phenolic, and anthocyanin of strawberry fruits stored at 4° C for 12 days.

| Treatments | Days | AsA          | Total phenolic | Anthocyanin   |
|------------|------|--------------|----------------|---------------|
| 2 SA       | 0    | 169.7±1.2 a  | 174.7±0.3 d    | 76.19±0.23 d  |
|            | 4    | 162.3±1.2 b  | 206.0±3.1 c    | 81.65±0.40 c  |
|            | 8    | 160.3±0.3 b  | 225.3±0.9 b    | 93.44±0.76 b  |
|            | 12   | 159.7±0.3 b  | 234.7±0.3 a    | 113.12±0.21 a |
| 4 SA       | 0    | 170.0±1.1 a  | 175.3±0.3 d    | 78.40±0.04 b  |
|            | 4    | 166.0±1.2 a  | 206.7±0.9 c    | 77.70±1.06 b  |
|            | 8    | 165.7±1.2 ab | 227.7±1.5 b    | 92.75±0.72 a  |
|            | 12   | 161.3±0.3 b  | 241.7±0.3 a    | 93.61±0.10 a  |
| 0.25 ABA   | 0    | 169.0±2.5 a  | 171.3±0.3 d    | 67.77±0.26 c  |
|            | 4    | 160.3±2.3 b  | 200.3±0.9 c    | 76.19±0.90 b  |
|            | 8    | 161.7±1.2 ab | 206.7±1.2 b    | 77.46±0.55 b  |
|            | 12   | 160.3±0.3 b  | 230.3±0.9a     | 92.15± 1.16 a |
| 0.50 ABA   | 0    | 166.0±1.1 a  | 162.3±0.3 d    | 65.22±0.59 c  |
|            | 4    | 161.7±1.2 b  | 204.0±0.6 c    | 76.90±1.41 b  |
|            | 8    | 160.0±0.0 b  | 222.7±0.9 b    | 76.21±1.49 b  |
|            | 12   | 159.3±0.3 b  | 230.0±0.6 a    | 88.56±0.73 a  |
| 0.25 MeJA  | 0    | 168.0±2.3 a  | 175.3±0.3 d    | 76.96±0.31 b  |
|            | 4    | 164.3±2.3 a  | 206.3±1.5 c    | 77.90±0.40 b  |
|            | 8    | 160.0±2.3 a  | 213.3±0.3 b    | 78.28±0.81 b  |
|            | 12   | 161.3±0.9 a  | 221.0 ±0.6 a   | 90.00±0.06 a  |
| 0.50 MeJA  | 0    | 165.0±2.5 a  | 176.3 ± 0.7 d  | 79.42±0.58 c  |
|            | 4    | 161.7±1.2 a  | 197.0 ± 0.6 c  | 92.35±0.04 b  |
|            | 8    | 163.3±3.7 a  | 211.0 ± 2.6 b  | 94.21±0.36 a  |
|            | 12   | 161.0±0.6 a  | 222.7 ±2.0 a   | 102.12±0.51 a |
| Control    | 0    | 160.3±2.3 a  | 156.7±0.3 d    | 71.99±0.84 c  |
|            | 4    | 159.7±0.3 a  | 177.7±0.9 c    | 78.45±0.58 b  |
|            | 8    | 157.7±1.2 a  | 193.0±0.6 d    | 80.51±0.83 b  |
|            | 12   | 158.0±1.2 a  | 202.7±0.9 a    | 89.10±0.21 a  |

The results are expressed as mean ±SE of three replicates followed by a letter. Different letters indicate significant statistical differences among days of storage in the same column ( $p < 0.05$ ).
